# Supplementary material
Source: PubMed Central journal article supplement (PMC10231188)
Supplement: aem.00272-23-s0001.pdf [file aem.00272-23-s0001.pdf]

1  
2  
3  
4  
5  
6  
7  
8  
9  
10  
11  
12  
13  
14  
15  
16  
17  
18  
19  
20  
21  
22  
23  
24  
25  
26

**Supplemental material**

**of**

**Genomic and secretomic approaches of the newly isolated *Perenniporia fraxinea* SS3 identified CAZymes potentially related to a serious pathogenesis of hardwood trees.**

Ruy Matsumoto,<sup>1†</sup> Jakia Jerin Mehjabin,<sup>2†</sup> Hideki Noguchi,<sup>3,4</sup> Toshizumi Miyamoto,<sup>5</sup> Taichi E. Takasuka,<sup>5,6</sup> Chiaki Hori,<sup>1,2\*</sup>

**Affiliations**

- <sup>1</sup> Research Faculty of Engineering, Hokkaido University, Sapporo 060-8628, Japan
- <sup>2</sup> Research Faculty of Environmental Earth Science, Hokkaido University, Sapporo 060-0810, Japan
- <sup>3</sup>Center for Genome Informatics, Joint Support-Center for Data Science Research, Research Organization of Information and Systems, Yata 1111, Mishima, Shizuoka 411-8540, Japan
- <sup>4</sup>Advanced Genomics Center, National Institute of Genetics, Yata 1111, Mishima, Shizuoka 411-8540, Japan
- <sup>5</sup>Research Faculty of Agriculture, Hokkaido University, Sapporo 060-8589, Japan
- <sup>6</sup>Global Station for Food, Land and Water Resources, Hokkaido University, Sapporo 060-8589, Japan

<sup>†</sup>These authors are equally contributed

\*Corresponding author:

E-mail, [chori@ees.hokudai.ac.jp](mailto:chori@ees.hokudai.ac.jp); Tel, +81-11-706-4522; Fax, +81-11-706-4522

1 Table S1. The five monokaryotic strains of *P. fraxinea* isolated from natural environments in  
 2 this study.

| Name                   | ITS rRNA<br>Accession# | Top BLASTn hit description_accession #              | E-value | Ident.<br>(%) |
|------------------------|------------------------|-----------------------------------------------------|---------|---------------|
| <i>P. fraxinea</i> SS1 | LC556223               | Vanderbylia fraxinea voucher<br>HFJAU0492_MN258672  | 0.0     | 99.6          |
| <i>P. fraxinea</i> SS2 | LC556224               | Vanderbylia fraxinea voucher KA17-<br>0410_MN294841 | 0.0     | 99.8          |
| <i>P. fraxinea</i> SS3 | LC556225               | Vanderbylia fraxinea voucher KA17-<br>0410_MN294841 | 0.0     | 100           |
| <i>P. fraxinea</i> SS4 | LC556226               | Vanderbylia fraxinea voucher KA17-<br>0410_MN294841 | 0.0     | 99.2          |
| <i>P. fraxinea</i> SS5 | LC556227               | Vanderbylia fraxinea voucher Dai<br>5326a_KX081103  | 0.0     | 99.8          |

3  
 4

1 Table S2. 29 Hypothetical proteins of culture filtrates of *P. fraxinea* SS3 cultivated in glucose,  
 2 cellulose and poplar wood powder media for five days.

| Gene           | Function              | Best hit species of Blastp search   | Detected in    |
|----------------|-----------------------|-------------------------------------|----------------|
| mRNA1518_trans | Hypothetical proteins | <i>Lentinus tigrinus</i> ALCF2SS1-6 | Glc; Cel; Wood |
| mRNA1196_trans | Hypothetical proteins | <i>Lentinus tigrinus</i> ALCF2SS1-6 | Glc; Cel; Wood |
| mRNA4734_trans | Hypothetical proteins | <i>Lentinus tigrinus</i> ALCF2SS1-6 | Glc; Cel; Wood |
| mRNA2392_trans | Hypothetical proteins | <i>Polyporus brumalis</i>           | Glc; Cel; Wood |
| mRNA4547_trans | Hypothetical proteins | <i>Ganoderma leucocontextum</i>     | Glc; Cel; Wood |
| mRNA4582_trans | Hypothetical proteins | <i>Earliella scabrosa</i>           | Glc; Cel; Wood |
| mRNA4223_trans | Hypothetical proteins | <i>Trametes cinnabarina</i>         | Glc; Cel; Wood |
| mRNA1380_trans | Hypothetical proteins | <i>Ganoderma Sinens</i>             | Glc; Cel; Wood |
| mRNA5563_trans | Hypothetical proteins | <i>Dichomitus squalens</i>          | Glc; Cel; Wood |
| mRNA7720_trans | Hypothetical proteins | <i>Dichomitus squalens</i>          | Glc; Cel; Wood |
| mRNA4929_trans | Hypothetical proteins | <i>Cubamyces</i> sp.                | Glc; Cel; Wood |
| mRNA6140_trans | Hypothetical proteins | <i>Ganoderma leucocontextum</i>     | Glc; Cel; Wood |
| mRNA6029_trans | Hypothetical proteins | <i>Cubamyces</i> sp.                | Glc; Cel; Wood |
| mRNA5919_trans | Hypothetical proteins | <i>Lentinus tigrinus</i> ALCF2SS1-6 | Glc; Cel;      |
| mRNA3734_trans | Hypothetical proteins | <i>Daedaleopsis nitida</i>          | Glc; Cel;      |
| mRNA6809_trans | Hypothetical proteins | <i>Fomes fomentarius</i>            | Glc; Wood      |
| mRNA5118_trans | Hypothetical proteins | <i>Earliella scabrosa</i>           | Glc; Wood      |
| mRNA7591_trans | Polyketide synthase   | <i>Daedaleopsis nitida</i>          | Cel; Wood      |
| mRNA6710_trans | Hypothetical proteins | <i>Trametes cinnabarina</i>         | Glc            |
| mRNA3879_trans | Hypothetical proteins | <i>Cerioporus squamosus</i>         | Glc            |
| mRNA4445_trans | Hypothetical proteins | <i>Dichomitus squalens</i>          | Glc            |
| mRNA7049_trans | Hypothetical proteins | <i>Polyporus brumalis</i>           | Glc            |
| mRNA1567_trans | Hypothetical proteins | <i>Lentinus tigrinus</i> ALCF2SS1-6 | Glc            |
| mRNA1662_trans | Hypothetical proteins | <i>Earliella scabrosa</i>           | Glc            |
| mRNA1214_trans | Hypothetical proteins | <i>Earliella scabrosa</i>           | Glc            |
| mRNA2407_trans | Hypothetical proteins | <i>Lentinus tigrinus</i> ALCF2SS1-6 | Glc            |
| mRNA3141_trans | Hypothetical proteins | <i>Daedaleopsis nitida</i>          | Wood           |
| mRNA4377_trans | Hypothetical proteins | <i>Cerioporus squamosus</i>         | Wood           |
| mRNA1660_trans | Hypothetical proteins | <i>Earliella scabrosa</i>           | Wood           |

3

4

5

1 Table S3. Top 10 abundant proteins of culture filtrates of *P. fraxinea* SS3 and *P.*  
2 *chrysosporium* RP78 cultivated in glucose, cellulose and poplar wood powder media for five  
3 days. emPAI value was calculated from biological triplicates as expression level of the detected  
4 protein.

| Strain | Carbon source | Accession ProteinID | CAZy family  | Putative function        | Cover (%) | # Unique Peptides | calc. MW (kDa) | calc. pI | emPAI |
|--------|---------------|---------------------|--------------|--------------------------|-----------|-------------------|----------------|----------|-------|
| Pfr    | Glucose       | mRNA5136            |              | Phosphoglycerate mutase  | 24.5      | 6                 | 40.7           | 4.74     | 67.1  |
|        |               | mRNA569             |              | Amine oxidase            | 51.9      | 17                | 56.6           | 4.86     | 50.8  |
|        |               | mRNA5813            |              | Acid protease            | 43.0      | 10                | 43.8           | 5.17     | 40.2  |
|        |               | mRNA6925            | AA1_1        | Laccase                  | 27.3      | 12                | 56.4           | 5.06     | 36.3  |
|        |               | mRNA3519            | GH25         | Lysozyme                 | 59.1      | 6                 | 24.8           | 6.37     | 36.3  |
|        |               | mRNA2484            |              | Acid protease            | 50.1      | 11                | 42.1           | 5.17     | 30.6  |
|        |               | mRNA5306            | GH17         | $\beta$ -1,3-glucosidase | 31.2      | 12                | 39.6           | 5.45     | 27.9  |
|        |               | mRNA5962            | AA1_1        | Laccase                  | 29.3      | 13                | 56.0           | 5.67     | 26.4  |
|        |               | mRNA6029            |              | Hypothetical             | 61.7      | 6                 | 20.2           | 5.71     | 25.8  |
|        |               | mRNA1786            | GH13_15      | $\alpha$ -amylase        | 40.5      | 11                | 46.5           | 5.71     | 21.8  |
|        | Cellulose     | mRNA6940            | GH7          | CBH/EG                   | 78.3      | 32                | 49.2           | 5.16     | 1556  |
|        |               | mRNA3133            | GH7          | CBH/EG                   | 46.5      | 16                | 48.8           | 4.84     | 665.1 |
|        |               | mRNA4140            | CBM1, GH6    | CBH/EG                   | 48.1      | 17                | 47.0           | 5.02     | 116.9 |
|        |               | mRNA6025            | GH45         | EG                       | 19.0      | 4                 | 20.9           | 5.71     | 55.2  |
|        |               | mRNA6069            | CBM1, GH10   | Xylanase                 | 53.5      | 13                | 43.0           | 5        | 41.2  |
|        |               | mRNA5626            | GH7          | CBH/EG                   | 41.0      | 12                | 49.1           | 4.5      | 34.5  |
|        |               | mRNA5111            | GH28         | Pectinase                | 61.5      | 13                | 37.5           | 5.17     | 33.1  |
|        |               | mRNA3447            | GH28         | Pectinase                | 42.3      | 12                | 46.5           | 6.52     | 22.7  |
|        |               | mRNA6067            | CBM1, GH10   | Xylanase                 | 35.3      | 8                 | 42.2           | 5.19     | 22.7  |
|        |               | mRNA1259            | AA9          | LPMO                     | 37.7      | 6                 | 24.2           | 6.79     | 20.5  |
|        | Wood          | mRNA6940            | GH7          | CBH/EG                   | 69.3      | 25                | 49.2           | 5.16     | 90.5  |
|        |               | mRNA6925            | AA1_1        | Laccase                  | 28.1      | 13                | 56.4           | 5.06     | 50.8  |
|        |               | mRNA3133            | GH7          | CBH/EG                   | 37.7      | 9                 | 48.8           | 4.84     | 24.8  |
|        |               | mRNA6916            | CBM1, GH10   | Xylanase                 | 46.3      | 14                | 39.7           | 6.54     | 14.4  |
|        |               | mRNA6067            | CBM1, GH10   | Xylanase                 | 28.9      | 5                 | 42.2           | 5.19     | 14.4  |
|        |               | mRNA1259            | AA9          | LPMO                     | 37.7      | 7                 | 24.2           | 6.79     | 11.9  |
|        |               | mRNA4140            | CBM1, GH6    | CBH/EG                   | 30.0      | 11                | 47.0           | 5.02     | 9.0   |
|        |               | mRNA7753            | GH12         | EG                       | 24.4      | 4                 | 26.2           | 5.78     | 9.0   |
|        |               | mRNA3519            | GH25         | Lysozyme                 | 26.7      | 4                 | 24.8           | 6.37     | 9.0   |
|        |               | mRNA70              | CBM50, CBM50 | Hypothetical             | 22.8      | 2                 | 14.0           | 4.13     | 9.0   |
| Pch    | Glucose       | 3003339             | GH152        | $\beta$ -1,3-glucanase   | 30.4      | 5                 | 26.8           | 4.59     | 62.1  |
|        |               | 2983557             | GH152        | $\beta$ -1,3-glucanase   | 30.1      | 5                 | 27.2           | 5.08     | 38.8  |
|        |               | 3014452             |              | Expansin                 | 26.2      | 6                 | 26.0           | 5.06     | 30.6  |
|        |               | 2962130             |              | Cerato-platanin          | 33.1      | 2                 | 14.7           | 4.88     | 20.5  |
|        |               | 3006885             | GH55         | $\beta$ -1,3-glucanase   | 16.3      | 11                | 82.0           | 5.8      | 19.3  |
|        |               | 2990416             |              | Hypothetical             | 46.5      | 4                 | 14.4           | 4.46     | 14.8  |
|        |               | 3005609             |              | Hypothetical             | 39.3      | 6                 | 20.1           | 4.6      | 13.7  |
|        |               | 4931                |              | Hypothetical             | 31.1      | 9                 | 38.5           | 4.69     | 13.3  |
|        |               | 1998089             |              | Hypothetical             | 65.0      | 6                 | 15.9           | 6.64     | 12.3  |
|        |               | 2986625             |              | Calmodulin-related       | 51.0      | 7                 | 16.8           | 4.28     | 11.6  |
|        | Cellulose     | 2983557             | GH152        | $\beta$ -1,3-glucanase   | 30.1      | 5                 | 27.2           | 5.08     | 99.0  |

|      |         |            |                        |      |    |      |      |       |
|------|---------|------------|------------------------|------|----|------|------|-------|
|      | 2971601 | GH7, CBM1  | CBH/EG                 | 49.2 | 16 | 54.9 | 5.3  | 47.3  |
|      | 3003339 | GH152      | $\beta$ -1,3-glucanase | 30.4 | 5  | 26.8 | 4.59 | 38.8  |
|      | 3030351 | CBM1, GH10 | Xylanase               | 54.7 | 9  | 40.1 | 6.86 | 28.3  |
|      | 2975821 | AA9        | LPMO                   | 80.7 | 9  | 24.9 | 7.53 | 27.5  |
|      | 2962130 |            | Cerato-platanin        | 33.1 | 2  | 14.7 | 4.88 | 20.5  |
|      | 137372  | GH7, CBM1  | CBH/EG                 | 40.7 | 11 | 58.1 | 5.21 | 19.0  |
|      | 3024676 |            | Lipase                 | 44.6 | 8  | 31.4 | 5.24 | 16.8  |
|      | 1998089 |            | Hypothetical           | 65.0 | 6  | 15.9 | 6.64 | 16.8  |
|      | 131440  | CBM1       | Hypothetical           | 40.4 | 4  | 23.2 | 4.54 | 16.8  |
| Wood | 2983557 | GH152      | $\beta$ -1,3-glucanase | 30.1 | 5  | 27.2 | 5.08 | 250.2 |
|      | 3003339 | GH152      | $\beta$ -1,3-glucanase | 30.4 | 5  | 26.8 | 4.59 | 62.1  |
|      | 2975821 | AA9        | LPMO                   | 83.6 | 11 | 24.9 | 7.53 | 52.4  |
|      | 2971601 | GH7, CBM1  | CBH/EG                 | 47.7 | 16 | 54.9 | 5.3  | 47.3  |
|      | 3006885 | GH55       | $\beta$ -1,3-glucanase | 20.4 | 12 | 82.0 | 5.8  | 27.9  |
|      | 137372  | GH7, CBM1  | CBH/EG                 | 36.7 | 13 | 58.1 | 5.21 | 24.1  |
|      | 4931    |            | Hypothetical           | 31.6 | 11 | 38.5 | 4.69 | 23.2  |
|      | 1998089 |            | Hypothetical           | 65.0 | 6  | 15.9 | 6.64 | 22.7  |
|      | 3030351 | CBM1, GH10 | Xylanase               | 54.7 | 15 | 40.1 | 6.86 | 20.5  |
|      | 2962130 |            | Cerato-platanin        | 33.1 | 2  | 14.7 | 4.88 | 20.5  |

1

2

1

2

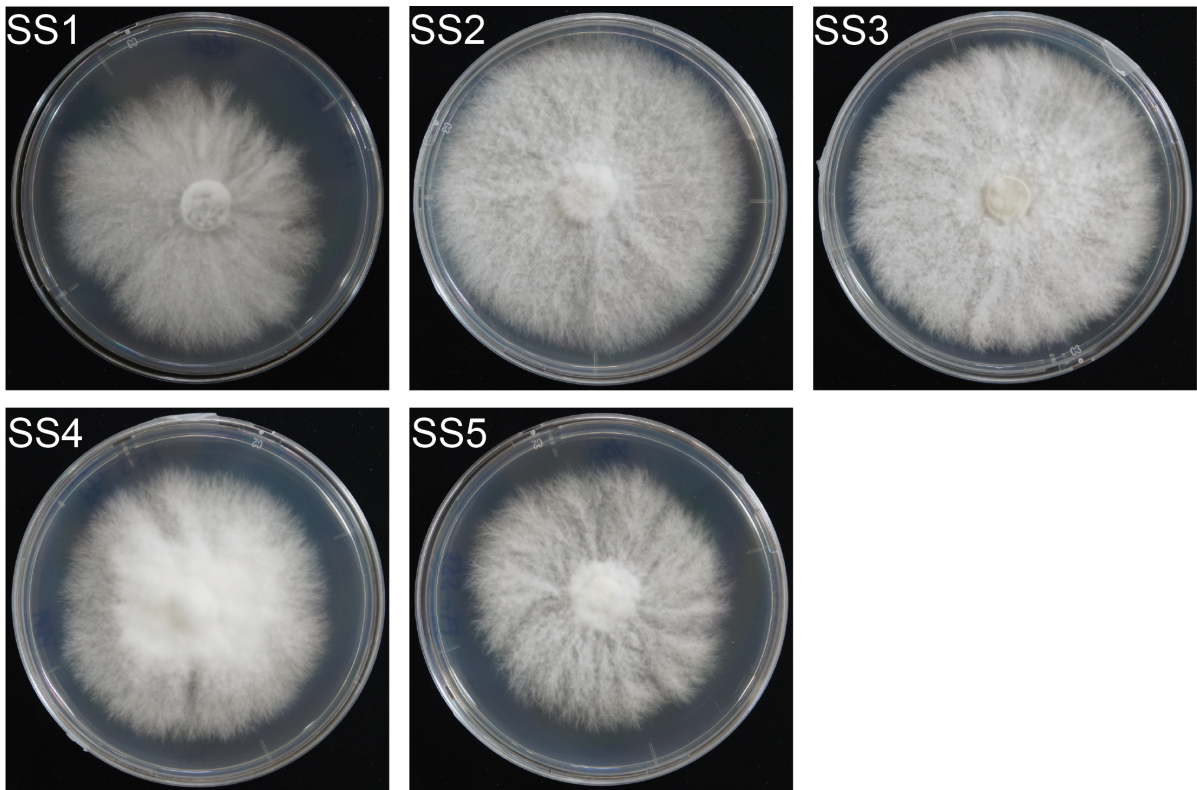

3

4 Figure S1. Mycelial growth of the five *P. fraxinea* strains SS1 to SS5 isolated from a *P.*

5 *fraxinea* fruiting body in this study.

6

1  
2

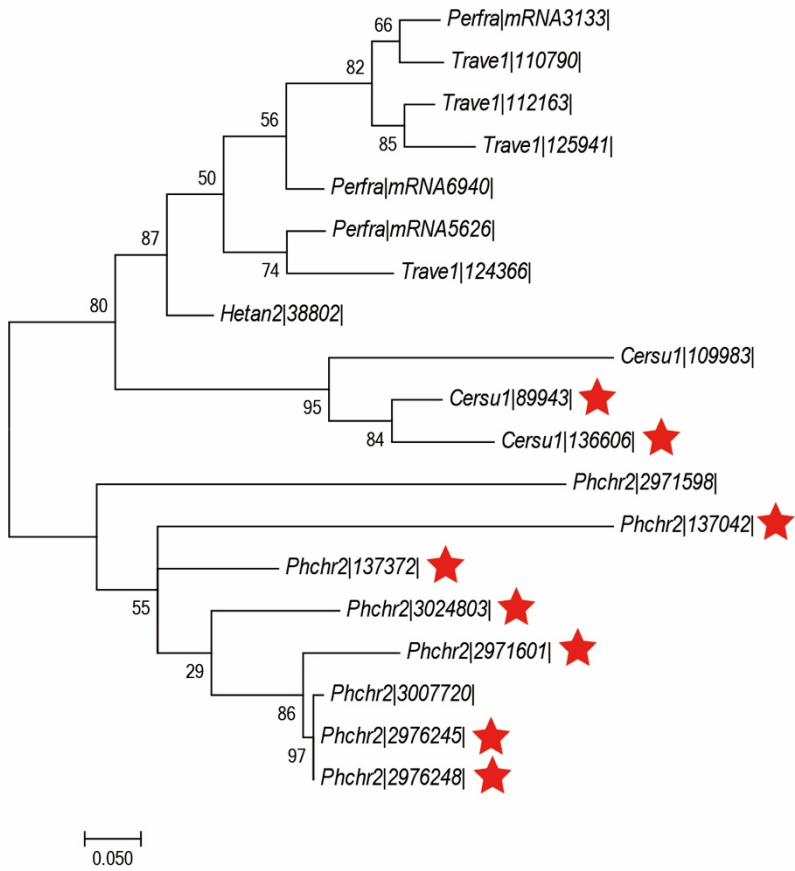

3  
4  
5  
6  
7  
8  
9

Figure S2. Phylogenetic tree of the GH7 family protein sequences of *P. fraxinea* SS3 and other fungi. Perfr, *P. fraxinea* SS3 Phach, *Phanerochaete chrysosporium* RP78 ver 2.2; Cersu, *Ceriporiopsis subvermispora*, Trave, *Trametes versicolor*; Hetan, *Heterobasidion annosum*. Star indicates the GH7 genes contain the CBM1 domain.

1

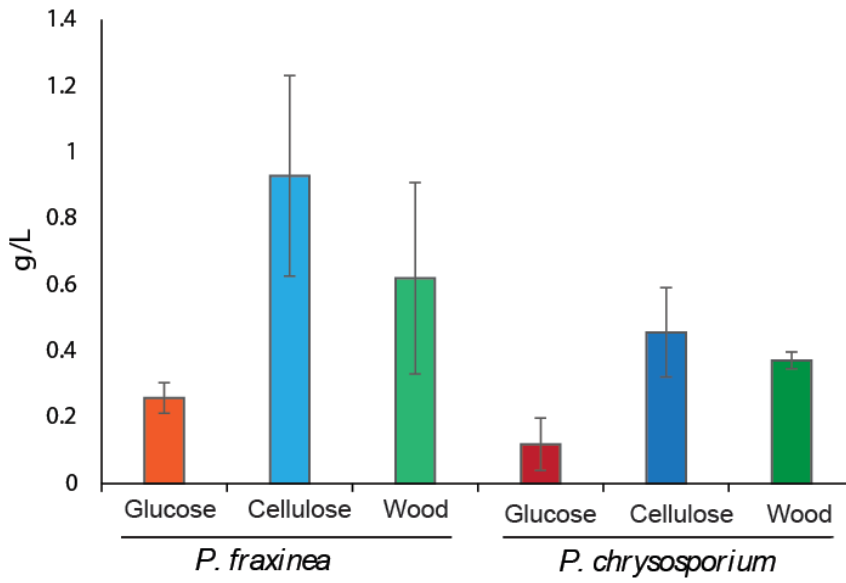

2

3

4 Figure S3. Protein concentrations of culture filtrates of *P. fraxinea* SS3 and *P. chrysosporium*  
5 RP78 cultivated in glucose, cellulose, and poplar wood powder media for five days. The  
6 average and standard deviation were calculated by three independent biological replicates.  
7 Student's T-test was performed in each medium between *P. fraxinea* SS3 and *P.*  
8 *chrysosporium* RP78, and there is no significant difference.

9



1

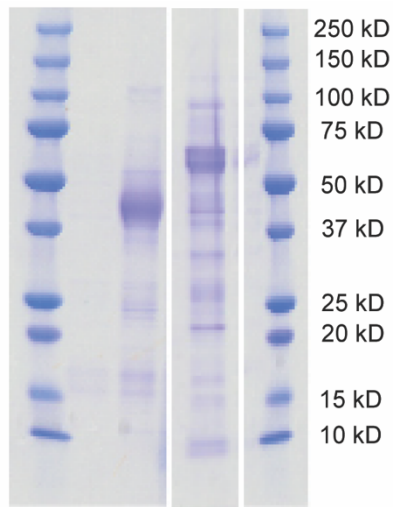

2

3

4 Figure S4. SDS-PAGE analysis of culture filtrates of *P. fraxinea* SS3 (left lane) and *P.*

5 *chrysosporium* RP78 (right lane) cultivated in cellulose media for five days.

6
